# Supplementary material for: Overpotential for CO2 electroreduction lowered on strained penta-twinned Cu nanowires
Source: PubMed Central journal article supplement (PMC5508656; doi:10.1039/c5sc02667a), 2015-08-19
Supplement: SC-006-C5SC02667A-s001.pdf [file SC-006-C5SC02667A-s001.pdf]

# Supplementary information for

## “Overpotential for CO<sub>2</sub> Electroreduction Lowered on Strained Penta- Twinned Cu Nanowires”

*Zhengzheng Chen, Xu Zhang, Gang Lu\**

Department of Physics and Astronomy, California State University, Northridge, CA  
91330, USA

### **Computational Details**

**Molecular Dynamics (MD) Simulations:** The MD simulations are performed using LAMMPS package [1] with the embedded-atom-method (EAM) potential [2] for Cu. The computational unit cell contains ~40000 atoms and the calculated lattice constant of Cu is 3.615 Å. The Cu nanowire is first equilibrated at 100 K for 100 fs, and then relaxed in the *NPT* ensemble at 50 K for 100 ps. The nanowire is then loaded along the long (*z*) axis at a constant strain rate of  $1 \times 10^7/s$ . The temperature is kept at 50 K by the Nosé–Hoover thermostat during the simulation.

**First-principles Density Functional Theory (DFT) Simulations:** The computational unit cell is consisted of 150 atoms as shown in Fig. 1c. The DFT calculations are performed using the Vienna ab initio simulation package [3-5]. The revised Perdew-Burke-Ernzerhof (RPBE) exchange-correlation functional [6] and the projected-augmented-wave pseudopotential [7] are used in the calculations. The Brillouin-zone integration is performed with a  $2 \times 6 \times 1$  *k*-mesh according to the Monkhorst-Pack scheme [8]. The energy cutoff is 400 eV and a Fermi-Dirac smearing width of 0.02 eV is employed. The optimized atomic geometries are achieved when forces on all the unconstrained atoms are

smaller than 0.03 eV/Å. The stabilizing effect of surrounding water layer was also considered with relevant values taken from reference [9]: Adsorbates CO\* and CHO\* are stabilized by 0.1 eV; COOH\* is stabilized by 0.25 eV and OH\* is stabilized by 0.5 eV. Therefore,  $\Delta G(\text{CO}_2(\text{g}) \rightarrow \text{COOH}^*)$  decreases by 0.25 eV,  $\Delta G(\text{COOH}^* \rightarrow \text{CO}^*)$  increases by 0.15 eV, and  $\Delta G(\text{CO}^* \rightarrow \text{CHO}^*)$  does not change. For the last two steps,  $\Delta G(\text{O}^* \rightarrow \text{OH}^*)$  decreases by 0.5 eV, and  $\Delta G(\text{OH}^* \rightarrow \text{H}_2\text{O}(\text{g}))$  increases by 0.5 eV.

## Computational Hydrogen Electrode Model

Following the work of Peterson et al. [9], we calculate the free energy diagrams for CO<sub>2</sub> reduction using so-called “Computational Hydrogen Electrode” (CHE) model [10], in which the reaction

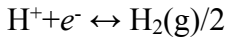

is defined to be in an equilibrium with gaseous H<sub>2</sub> at pressure of 1 atm. at a zero bias voltage, any pH values and temperature. Therefore, in the context of the CHE model, we have the following relation in chemical potential  $\mu$  of various species at the zero bias voltage

$$\mu(\text{H}^+) + \mu(e^-) = \mu(\text{H}_2(\text{g}))/2.$$

With this relation, instead of computing the chemical potential of the proton and electron pair, which is very difficult, we focus on the chemical potential of gaseous H<sub>2</sub>.  $\mu(\text{H}_2(\text{g}))$  is taken as -6.884 eV throughout the current work.

The free energy diagram for CO<sub>2</sub> → CH<sub>4</sub> can be calculated based on CHE model. The correction terms, including zero-point energy, entropy and heat capacity have been included in the calculations:

$$G = E + E_{\text{ZPE}} - TS + \int C_p dT.$$

All correction terms are calculated based on the molecular vibration analysis [11]. Listed in Table S1 are the correction terms of CO\* and CHO\* under  $\epsilon_{zz} = 0\%$  and 8%, respectively.

**Table S1** Correction terms on the free energy  $G$  for intermediates  $\text{CO}^*$  and  $\text{CHO}^*$ 

| $\varepsilon_{zz}$ (%) | Intermediate   | $E_{\text{ZPE}}$ (meV) | $-TS$ (meV) | $\int C_p dT$ (meV) |
|------------------------|----------------|------------------------|-------------|---------------------|
| 0                      | $\text{CO}^*$  | 181                    | -140        | 74                  |
|                        | $\text{CHO}^*$ | 460                    | -139        | 73                  |
| 8                      | $\text{CO}^*$  | 169                    | -106        | 58                  |
|                        | $\text{CHO}^*$ | 465                    | -123        | 68                  |

## Production of $\text{C}_2\text{H}_4$

As reported by previous experiments,  $\text{C}_2\text{H}_4$  is a common product of  $\text{CO}_2$  reduction on Cu electrode.  $\text{C}_2\text{H}_4$  is also a representative of higher order hydrocarbon fuels containing C-C bonds. Based on previous experimental and theoretical studies [12-14], two relevant pathways are explored in the present work.

The first pathway is shown as Scheme 1:

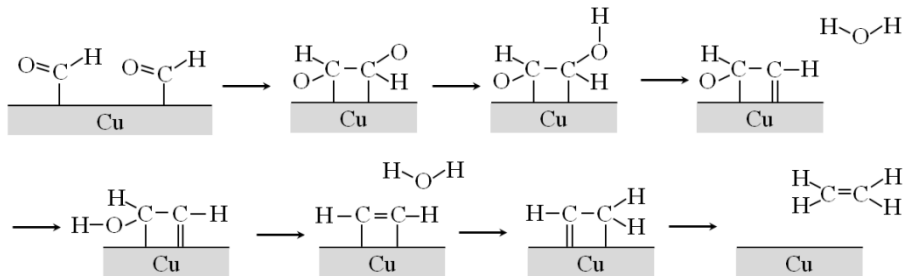**Scheme 1.** Proposed first reaction pathway for the production of  $\text{C}_2\text{H}_4$ .

In Scheme 1, the C-C bond is formed by the dimerization of the intermediate  $\text{CHO}^*$ . Therefore the migration of the  $\text{CHO}$  on the surface is an important process and should be studied here. The migration pathway of the  $\text{CHO}$  on the NW edge is shown in Figure S1(a).  $\text{CHO}$  takes a rotation-hopping-rotation process to achieve the highest mobility. First, the bidentate  $\text{CHO}$  rotates  $90^\circ$  to form a monodentate configuration in which the  $\text{CHO}$  is perpendicular to the edge. The barrier of the rotation is 0.32 eV. Next, the

monodentate CHO hops on the edge with a barrier of 0.12 eV. Finally, the meta-stable monodentate CHO overcomes a 0.15 eV barrier to rotate back to the stable bidentate configuration at an adjacent position on the edge. We also calculate the migrating barrier of the CHO\* without rotation. The barrier is 0.61 eV, almost doubling the rotation energy barrier. In comparison, the migrating barrier of CHO on the (001) facet is 1.1 eV. Therefore in the following we only focus the production of C<sub>2</sub>H<sub>4</sub> on the edge of the NW.

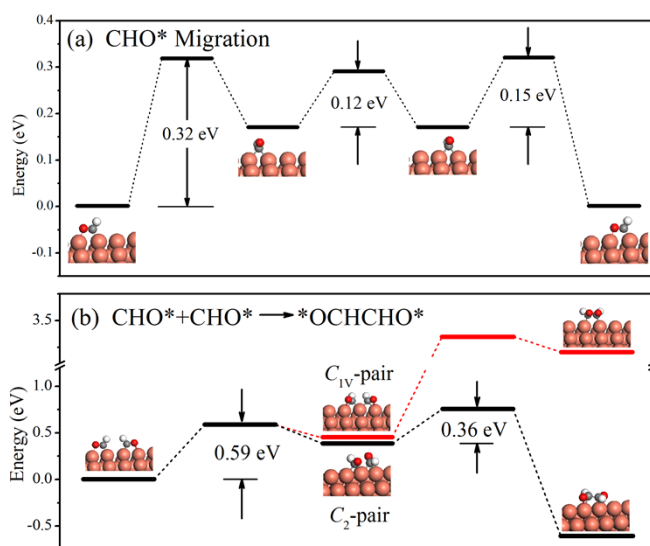

**Figure S1.** (a) The migration energy barriers of CHO on the edge of the NW. (b) The free energy diagram for the formation of C-C bond. The black and red horizontal lines represent the formation of C-C bond via the C<sub>2</sub>-pair and C<sub>1v</sub>-pair, respectively.

We next explore the C-C bond formation. As shown in Figure S1(b), when two bidentate CHO become the nearest neighbors, they will rotate and form two intermediates after overcoming a 0.59 eV migration barrier. One intermediate is labeled as “C<sub>2</sub>-pair” in which the two CHO molecules form C<sub>2</sub> symmetry, and the two O atoms are well separated. Another intermediate is labeled as “C<sub>1v</sub>-pair” in which two CHO molecules

have the reflection symmetry.  $C_2$ -pair is easier to form C-C bond and the energy barrier is 0.39 eV and the formed  $*OCHCHO*$  is 1.01 eV lower than the  $C_2$ -pair. In contrast, it is energetically very costly for the  $C_{1v}$ -pair to form C-C bond. As shown in Figure S1(b), the barrier of the C-C bond formation is 2.9 eV for the  $C_{1v}$ -pair. As a result, the rate of  $C_2H_4$  production in this pathway is slow because only half of the CHO-CHO dimers are active to produce  $C_2H_4$ .

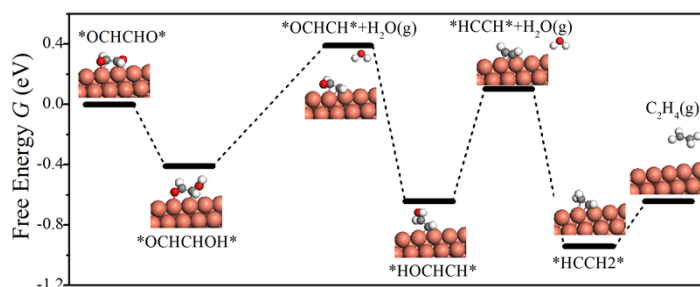

**Figure S2.** The free energy diagram of the  $C_2H_4$  production.

We next examine the protonation of the  $*OCHCHO*$  from the  $C_2$ -pair. The free energy diagram is shown in Figure S2. The highest energy barrier is 0.9 eV. Correspondingly,  $U_{op}$  of  $C_2H_4$  production is determined as 0.9 V, 43% higher than that of  $CH_4$  production.

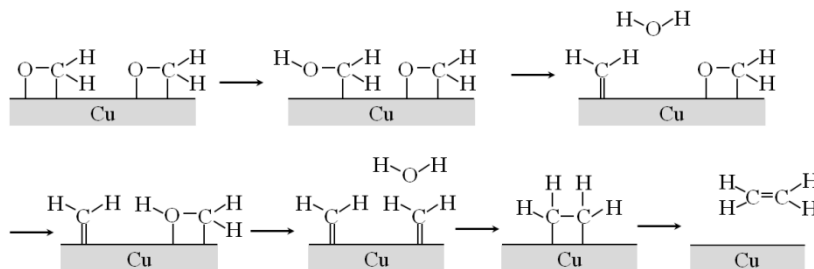

**Scheme 2.** Proposed second reaction pathway for the production of  $C_2H_4$ .  $CH_2^*$  is produced from the protonation of  $CH_2O^*$ . The dimerization of the  $CH_2^*$  leads the production of  $C_2H_4$ .

The second pathway is pointed out by a recent study [15], and is shown as Scheme 2. Similar to the first pathway, we have only focused on the edge of the NW. Figure S3 depicts the free energy diagram of the second pathway. The overpotential  $U_{op}$  along this pathway is determined by the protonation of  $\text{CH}_2\text{OH}^*$  i.e.,  $\text{CH}_2\text{OH}^* \rightarrow \text{CH}_2^* + \text{H}_2\text{O}(\text{g})$ , which is 0.81 V, 10% lower than that in the first pathway, but is still 28 % higher than the  $U_{op}$  of  $\text{CH}_4$  production. On the other hand,  $\text{C}_2\text{H}_4$  production in the second pathway may be inefficient at lower and medium temperatures since the migration barriers are relatively high. As shown in Figure S3(b),  $\text{CH}_2^*$  does not have a high mobility along the edge since the migration barrier is 0.82 eV. Desorption of  $\text{C}_2\text{H}_4$  is another rate-limiting step as it requires an energy barrier of 0.74 eV.

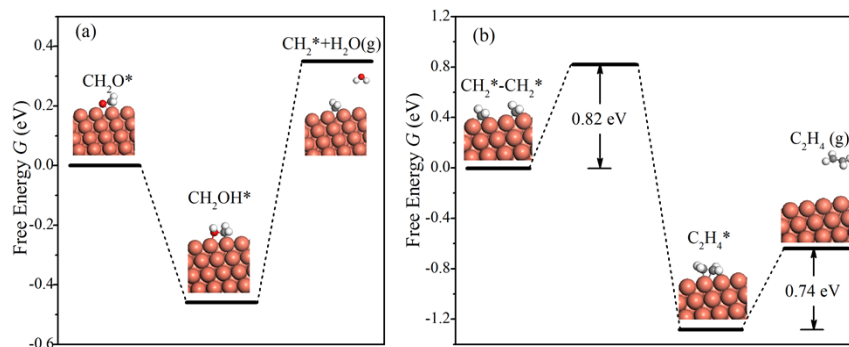

**Figure S3.** The free energy diagram of the second pathway of the  $\text{C}_2\text{H}_4$  production.

## Coordinates in DFT Calculations

1. Cu NW:

Supercell

|         |        |         |
|---------|--------|---------|
| 33.5491 | 0.0000 | 0.0000  |
| 0.0000  | 7.6686 | 0.0000  |
| 0.0000  | 0.0000 | 22.3415 |

Fractional coordinates:

|          |          |          |
|----------|----------|----------|
| 0.186810 | 0.832430 | 0.000000 |
| 0.186820 | 0.499480 | 0.000004 |
| 0.186830 | 0.166520 | 0.000009 |
| 0.687970 | 0.166600 | 0.000022 |
| 0.687960 | 0.499540 | 0.000027 |
| 0.687950 | 0.832500 | 0.000027 |
| 0.937410 | 0.000117 | 0.026690 |
| 0.937400 | 0.333070 | 0.026700 |
| 0.937390 | 0.666030 | 0.026710 |
| 0.124280 | 0.665950 | 0.032130 |
| 0.124290 | 0.332990 | 0.032140 |
| 0.124300 | 0.000026 | 0.032140 |
| 0.750510 | 0.000117 | 0.032160 |
| 0.750500 | 0.333090 | 0.032160 |
| 0.750490 | 0.666040 | 0.032160 |
| 0.061960 | 0.832420 | 0.063650 |
| 0.061970 | 0.499460 | 0.063660 |
| 0.061980 | 0.166510 | 0.063660 |
| 0.812810 | 0.166600 | 0.063680 |
| 0.812810 | 0.499560 | 0.063690 |
| 0.812800 | 0.832510 | 0.063690 |
| 0.249400 | 0.832430 | 0.066200 |
| 0.249410 | 0.499480 | 0.066200 |
| 0.249430 | 0.166520 | 0.066210 |
| 0.625360 | 0.499540 | 0.066220 |
| 0.625370 | 0.166590 | 0.066220 |
| 0.625350 | 0.832500 | 0.066220 |
| 0.000000 | 0.665940 | 0.094230 |
| 0.000009 | 0.332980 | 0.094240 |
| 0.000018 | 0.000026 | 0.094240 |
| 0.874790 | 0.000130 | 0.094260 |
| 0.874780 | 0.333090 | 0.094260 |
| 0.874770 | 0.666040 | 0.094270 |
| 0.186870 | 0.665950 | 0.098660 |
| 0.186880 | 0.332980 | 0.098660 |
| 0.186890 | 0.000026 | 0.098670 |
| 0.687920 | 0.000130 | 0.098680 |
| 0.687910 | 0.333090 | 0.098680 |
| 0.687900 | 0.666040 | 0.098680 |
| 0.124580 | 0.832420 | 0.130540 |
| 0.124590 | 0.499460 | 0.130550 |
| 0.124600 | 0.166500 | 0.130550 |
| 0.750200 | 0.166620 | 0.130570 |
| 0.750190 | 0.499570 | 0.130570 |
| 0.750180 | 0.832520 | 0.130580 |
| 0.312040 | 0.832430 | 0.132000 |
| 0.312050 | 0.499480 | 0.132000 |
| 0.312060 | 0.166520 | 0.132000 |
| 0.562740 | 0.166590 | 0.132010 |
| 0.562720 | 0.832500 | 0.132010 |
| 0.562730 | 0.499540 | 0.132010 |
| 0.062660 | 0.665940 | 0.161470 |
| 0.062670 | 0.332970 | 0.161480 |
| 0.062680 | 0.000013 | 0.161480 |
| 0.812130 | 0.000143 | 0.161500 |
| 0.812120 | 0.333100 | 0.161500 |

|          |          |          |
|----------|----------|----------|
| 0.812110 | 0.666050 | 0.161510 |
| 0.249480 | 0.665950 | 0.164760 |
| 0.249500 | 0.000026 | 0.164760 |
| 0.249490 | 0.332990 | 0.164760 |
| 0.625300 | 0.000117 | 0.164770 |
| 0.625290 | 0.333090 | 0.164770 |
| 0.625280 | 0.666040 | 0.164770 |
| 0.437380 | 0.665990 | 0.165000 |
| 0.437400 | 0.000078 | 0.165000 |
| 0.437390 | 0.333030 | 0.165000 |
| 0.187200 | 0.832420 | 0.197030 |
| 0.187210 | 0.499450 | 0.197030 |
| 0.187220 | 0.166500 | 0.197040 |
| 0.687570 | 0.166620 | 0.197050 |
| 0.687560 | 0.499570 | 0.197060 |
| 0.687550 | 0.832520 | 0.197060 |
| 0.374710 | 0.832450 | 0.197440 |
| 0.374730 | 0.166540 | 0.197450 |
| 0.374720 | 0.499490 | 0.197450 |
| 0.500060 | 0.499530 | 0.197450 |
| 0.500050 | 0.832490 | 0.197450 |
| 0.500070 | 0.166580 | 0.197450 |
| 0.125340 | 0.665920 | 0.228360 |
| 0.125350 | 0.332970 | 0.228360 |
| 0.125360 | 0.000013 | 0.228360 |
| 0.749450 | 0.000143 | 0.228380 |
| 0.749440 | 0.333100 | 0.228380 |
| 0.749430 | 0.666050 | 0.228390 |
| 0.312100 | 0.665950 | 0.230390 |
| 0.312120 | 0.000039 | 0.230390 |
| 0.312110 | 0.332990 | 0.230390 |
| 0.562690 | 0.000117 | 0.230400 |
| 0.562670 | 0.333070 | 0.230400 |
| 0.562660 | 0.666030 | 0.230400 |
| 0.437400 | 0.166550 | 0.262830 |
| 0.437390 | 0.499520 | 0.262830 |
| 0.437370 | 0.832470 | 0.262830 |
| 0.249820 | 0.832420 | 0.263060 |
| 0.249830 | 0.499460 | 0.263070 |
| 0.249840 | 0.166500 | 0.263070 |
| 0.624960 | 0.166620 | 0.263080 |
| 0.624940 | 0.499570 | 0.263080 |
| 0.624940 | 0.832520 | 0.263080 |
| 0.188000 | 0.665920 | 0.294830 |
| 0.188010 | 0.332970 | 0.294840 |
| 0.188020 | 0.000000 | 0.294840 |
| 0.686780 | 0.000143 | 0.294850 |
| 0.686770 | 0.333100 | 0.294850 |
| 0.686760 | 0.666050 | 0.294860 |
| 0.374730 | 0.665980 | 0.295550 |
| 0.374740 | 0.333010 | 0.295550 |
| 0.374750 | 0.000052 | 0.295550 |
| 0.500050 | 0.000104 | 0.295550 |
| 0.500040 | 0.333060 | 0.295550 |
| 0.500030 | 0.666020 | 0.295550 |
| 0.312400 | 0.499460 | 0.328560 |



|          |          |          |
|----------|----------|----------|
| 0.312390 | 0.832430 | 0.328560 |
| 0.312410 | 0.166510 | 0.328560 |
| 0.562380 | 0.166600 | 0.328570 |
| 0.562370 | 0.499560 | 0.328570 |
| 0.562360 | 0.832510 | 0.328570 |
| 0.437380 | 0.665990 | 0.360450 |
| 0.437400 | 0.000078 | 0.360450 |
| 0.437390 | 0.333030 | 0.360450 |
| 0.250610 | 0.665940 | 0.360840 |
| 0.250630 | 0.332970 | 0.360850 |
| 0.250640 | 0.000013 | 0.360850 |
| 0.624170 | 0.000143 | 0.360860 |
| 0.624140 | 0.666050 | 0.360860 |
| 0.624150 | 0.333100 | 0.360860 |
| 0.373973 | 0.832741 | 0.397145 |
| 0.373965 | 0.166650 | 0.397215 |
| 0.373871 | 0.499705 | 0.397244 |
| 0.500603 | 0.832791 | 0.397234 |
| 0.500736 | 0.499710 | 0.397348 |
| 0.500630 | 0.166686 | 0.397298 |
| 0.311054 | 0.666419 | 0.429323 |
| 0.311070 | 0.332681 | 0.429351 |
| 0.311185 | 0.999595 | 0.429239 |
| 0.563430 | 0.999674 | 0.429206 |
| 0.563529 | 0.332785 | 0.429386 |
| 0.563523 | 0.666500 | 0.429383 |
| 0.437028 | 0.832953 | 0.461894 |
| 0.437037 | 0.499748 | 0.461986 |
| 0.437046 | 0.166600 | 0.461927 |
| 0.373030 | 0.666739 | 0.495986 |
| 0.373135 | 0.999793 | 0.496046 |
| 0.373058 | 0.332833 | 0.496040 |
| 0.500745 | 0.666704 | 0.496058 |
| 0.500752 | 0.999804 | 0.495945 |
| 0.500778 | 0.332934 | 0.496086 |
| 0.436698 | 0.332661 | 0.557820 |
| 0.436640 | 0.666738 | 0.557796 |
| 0.436811 | 0.999794 | 0.557851 |

## 2. Cu NW on a graphene substrate

### Supercell

|          |         |          |
|----------|---------|----------|
| 25.56191 | 0.00000 | 0.00000  |
| 0.00000  | 2.55619 | 0.00000  |
| 0.00000  | 0.00000 | 25.30500 |

### Fractional coordinates

|    |          |          |          |
|----|----------|----------|----------|
| Cu | 0.000000 | 0.000000 | 0.000000 |
| Cu | 0.100000 | 0.000000 | 0.000000 |
| Cu | 0.200000 | 0.000000 | 0.000000 |
| Cu | 0.300000 | 0.000000 | 0.000000 |
| Cu | 0.400000 | 0.000000 | 0.000000 |
| Cu | 0.500000 | 0.000000 | 0.000000 |

|    |          |          |          |
|----|----------|----------|----------|
| Cu | 0.600000 | 0.000000 | 0.000000 |
| Cu | 0.700000 | 0.000000 | 0.000000 |
| Cu | 0.800000 | 0.000000 | 0.000000 |
| Cu | 0.900000 | 0.000000 | 0.000000 |
| Cu | 0.050000 | 0.500000 | 0.071428 |
| Cu | 0.150000 | 0.500000 | 0.071428 |
| Cu | 0.250000 | 0.500000 | 0.071428 |
| Cu | 0.350000 | 0.500000 | 0.071428 |
| Cu | 0.450000 | 0.500000 | 0.071428 |
| Cu | 0.550000 | 0.500000 | 0.071428 |
| Cu | 0.650000 | 0.500000 | 0.071428 |
| Cu | 0.750000 | 0.500000 | 0.071428 |
| Cu | 0.850000 | 0.500000 | 0.071428 |
| Cu | 0.950000 | 0.500000 | 0.071428 |
| Cu | 0.000000 | 0.000000 | 0.142857 |
| Cu | 0.100000 | 0.000000 | 0.142857 |
| Cu | 0.200000 | 0.000000 | 0.142857 |
| Cu | 0.300000 | 0.000000 | 0.142857 |
| Cu | 0.400000 | 0.000000 | 0.142857 |
| Cu | 0.500000 | 0.000000 | 0.142857 |
| Cu | 0.600000 | 0.000000 | 0.142857 |
| Cu | 0.700000 | 0.000000 | 0.142857 |
| Cu | 0.800000 | 0.000000 | 0.142857 |
| Cu | 0.900000 | 0.000000 | 0.142857 |
| Cu | 0.050133 | 0.500000 | 0.215063 |
| Cu | 0.149912 | 0.500000 | 0.215284 |
| Cu | 0.249813 | 0.500000 | 0.215232 |
| Cu | 0.350036 | 0.500000 | 0.215170 |
| Cu | 0.450115 | 0.500000 | 0.215241 |
| Cu | 0.550133 | 0.500000 | 0.215063 |
| Cu | 0.649912 | 0.500000 | 0.215284 |
| Cu | 0.749813 | 0.500000 | 0.215232 |
| Cu | 0.850036 | 0.500000 | 0.215170 |
| Cu | 0.950115 | 0.500000 | 0.215241 |
| Cu | 0.000318 | 0.000000 | 0.287251 |
| Cu | 0.099955 | 0.000000 | 0.287529 |
| Cu | 0.199720 | 0.000000 | 0.287476 |
| Cu | 0.299808 | 0.000000 | 0.287195 |
| Cu | 0.400143 | 0.000000 | 0.287148 |
| Cu | 0.500318 | 0.000000 | 0.287251 |
| Cu | 0.599955 | 0.000000 | 0.287529 |
| Cu | 0.699720 | 0.000000 | 0.287476 |
| Cu | 0.799808 | 0.000000 | 0.287195 |
| Cu | 0.900143 | 0.000000 | 0.287148 |
| Cu | 0.050154 | 0.500000 | 0.360044 |
| Cu | 0.149923 | 0.500000 | 0.360147 |
| Cu | 0.249744 | 0.500000 | 0.359608 |
| Cu | 0.350164 | 0.500000 | 0.359196 |
| Cu | 0.450244 | 0.500000 | 0.359451 |
| Cu | 0.550154 | 0.500000 | 0.360044 |
| Cu | 0.649923 | 0.500000 | 0.360147 |
| Cu | 0.749744 | 0.500000 | 0.359608 |
| Cu | 0.850164 | 0.500000 | 0.359196 |
| Cu | 0.950244 | 0.500000 | 0.359451 |
| Cu | 0.000059 | 0.000000 | 0.430095 |
| Cu | 0.100192 | 0.000000 | 0.430560 |

|    |          |          |          |
|----|----------|----------|----------|
| Cu | 0.200158 | 0.000000 | 0.430406 |
| Cu | 0.300154 | 0.000000 | 0.429370 |
| Cu | 0.400078 | 0.000000 | 0.429508 |
| Cu | 0.500059 | 0.000000 | 0.430095 |
| Cu | 0.600192 | 0.000000 | 0.430560 |
| Cu | 0.700158 | 0.000000 | 0.430406 |
| Cu | 0.800154 | 0.000000 | 0.429370 |
| Cu | 0.900078 | 0.000000 | 0.429508 |
| C  | 0.999954 | 0.000000 | 0.576561 |
| C  | 0.027389 | 0.500000 | 0.576291 |
| C  | 0.083278 | 0.500000 | 0.576097 |
| C  | 0.110763 | 0.000000 | 0.576185 |
| C  | 0.166640 | 0.000000 | 0.576648 |
| C  | 0.194100 | 0.500000 | 0.576912 |
| C  | 0.249969 | 0.500000 | 0.577587 |
| C  | 0.277426 | 0.000000 | 0.577845 |
| C  | 0.333292 | 0.000000 | 0.578058 |
| C  | 0.360742 | 0.500000 | 0.577985 |
| C  | 0.416626 | 0.500000 | 0.577538 |
| C  | 0.444085 | 0.000000 | 0.577262 |
| C  | 0.499954 | 0.000000 | 0.576561 |
| C  | 0.527389 | 0.500000 | 0.576291 |
| C  | 0.583278 | 0.500000 | 0.576097 |
| C  | 0.610763 | 0.000000 | 0.576185 |
| C  | 0.666640 | 0.000000 | 0.576648 |
| C  | 0.694100 | 0.500000 | 0.576912 |
| C  | 0.749969 | 0.500000 | 0.577587 |
| C  | 0.777426 | 0.000000 | 0.577845 |
| C  | 0.833292 | 0.000000 | 0.578058 |
| C  | 0.860742 | 0.500000 | 0.577985 |
| C  | 0.916626 | 0.500000 | 0.577538 |
| C  | 0.944085 | 0.000000 | 0.577262 |

## Reference

1. Plimpton, S. J. *J. Comput. Phys.* **1995**, *117*, 1 (<http://lammmps.sandia.gov>).
2. Mishin, Y.; Mehl, M. J.; Papaconstantopoulos, D. A.; Voter, A. F.; Kress, J. D. *Phys. Rev. B.* **2001**, *63*, 224106.
3. Kresse, G.; Hafner, J. *Phys. Rev. B.* **1993**, *47*, 558-561(R).
4. Kresse, G.; Hafner, J. *Phys. Rev. B.* **1994**, *49*, 14251-14269.
5. Kresse, G.; Hafner, J. *Comput. Mater. Sci.* **1996**, *6*, 15-50.
6. Hammer, B.; Hansen, L. B.; Nørskov, J. K. *Phys. Rev. B.* **1999**, *59*, 7413-7421.
7. Blöchl, P. E. *Phys. Rev. B* **1994**, *50*, 17953.
8. Monkhorst, H. J.; Pack, J. D. *Phys. Rev. B.* **1976**, *13*, 5188-5192.
9. Peterson, A. A.; Abild-Pedersen, F.; Studt, F.; Rossmeisl, J.; Nørskov, J. K. *Energy Environ. Sci.* **2010**, *3*, 1311-1315.

10. Nørskov, J. K.; Rossmeisl, J.; Logadottir, A.; Lindqvist, L. *J. Phys. Chem. B.* **2004**, *108*, 17886-17892.
11. Cramer, C. J. *Essentials of Computational Chemistry* (Wiley, 2004), 2<sup>nd</sup> edition.
12. Hori, Y.; Murata, A.; Takahashi, R. *J. Chem. Soc., Faraday Trans.* **1989**, *85*, 2309-2326.
13. Kuhl, K. P.; Cave, E. R.; Abram, D. N., Jaramillo, T. F. *Energy Environ. Sci.* **2012**, *5*, 7050-7059.
14. Durand, W. J.; Peterson, A. A.; Studt, F.; Abild-Pedersen, F.; Nørskov, J. K. *Surf. Sci.* **2011**, *605*, 1354-1359.
15. Nie, X. W.; Esopi, M. R.; Janik, M. J., Asthagiri, A. *Angew. Chem. Int. Ed.* **2013**, *52*, 2459-2462.
